# Supplementary material for: TAK1-mediated phosphorylation of PLCE1 represses PIP2 hydrolysis to impede esophageal squamous cancer metastasis
Source: eLife journal article supplement (doi:10.7554/elife.97373), 2024-06-03
Supplement: fig1-data2 [file elife-97373-fig1-data2-v1.zip]

**Figure 1A**

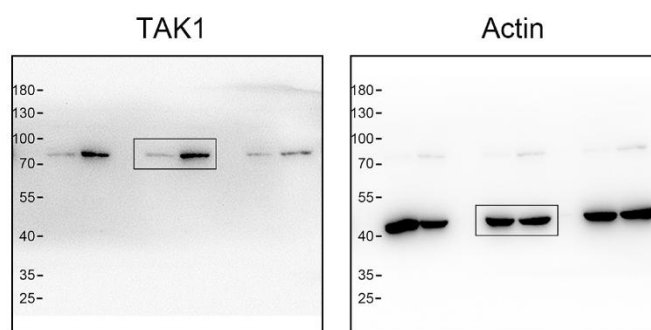

**Figure 1E**

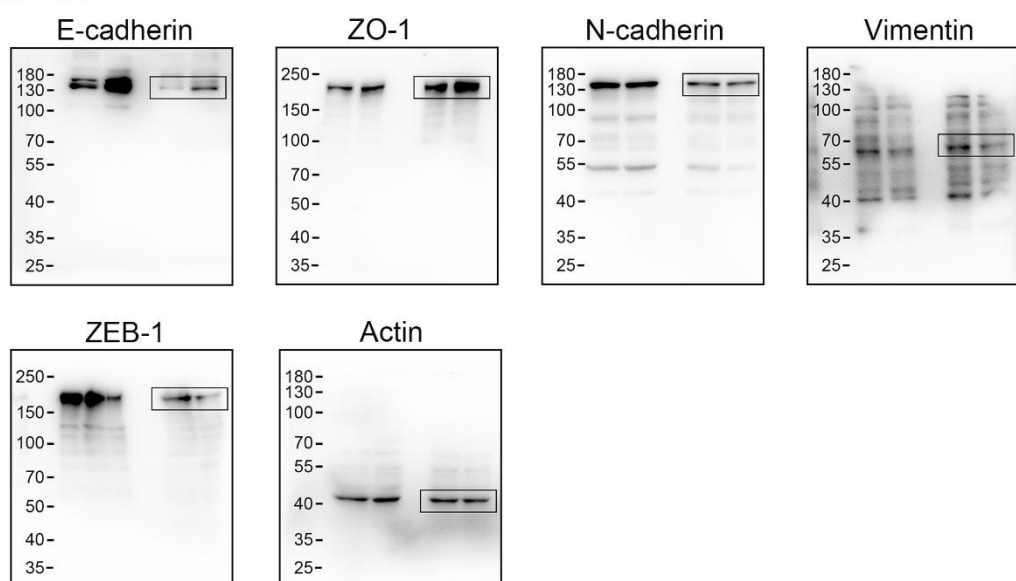

**Figure 1I**

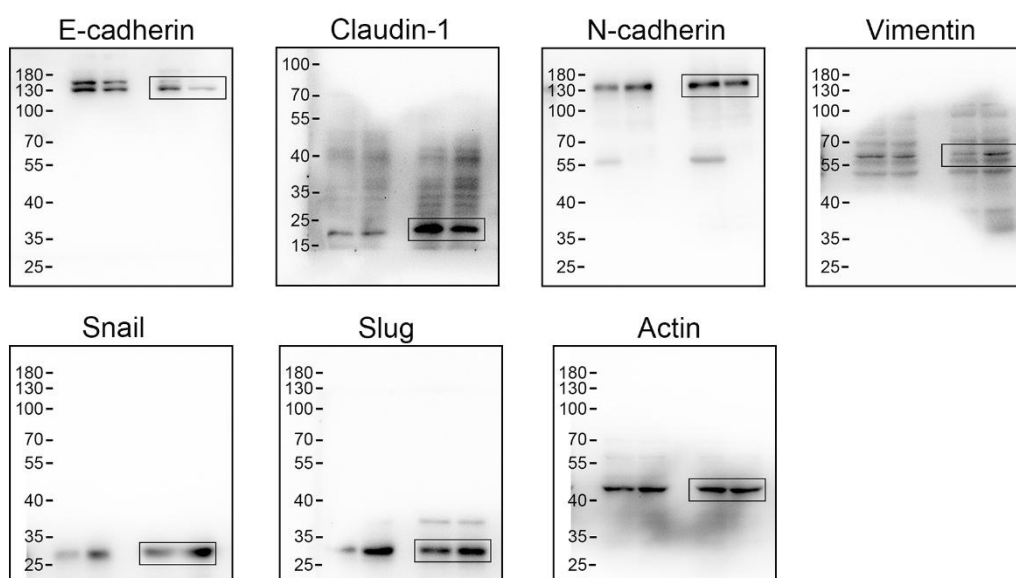

Figure 1, Source Data 1. Original membranes corresponding to Figure 1, panel A, E and I, indicating the relevant bands.
