# Supplementary material for: TAK1-mediated phosphorylation of PLCE1 represses PIP2 hydrolysis to impede esophageal squamous cancer metastasis
Source: eLife journal article supplement (doi:10.7554/elife.97373), 2024-06-03
Supplement: fig1-figsupp3-data2 [file elife-97373-fig1-figsupp3-data2-v1.zip]

**Figure 1–Figure Supplement 3B**

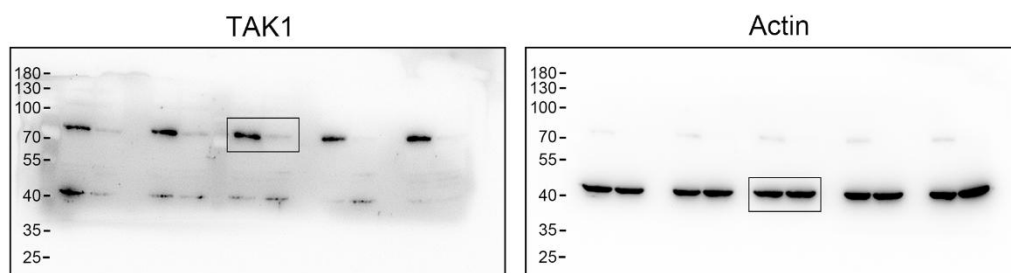

**Figure 1–Figure Supplement 3F**

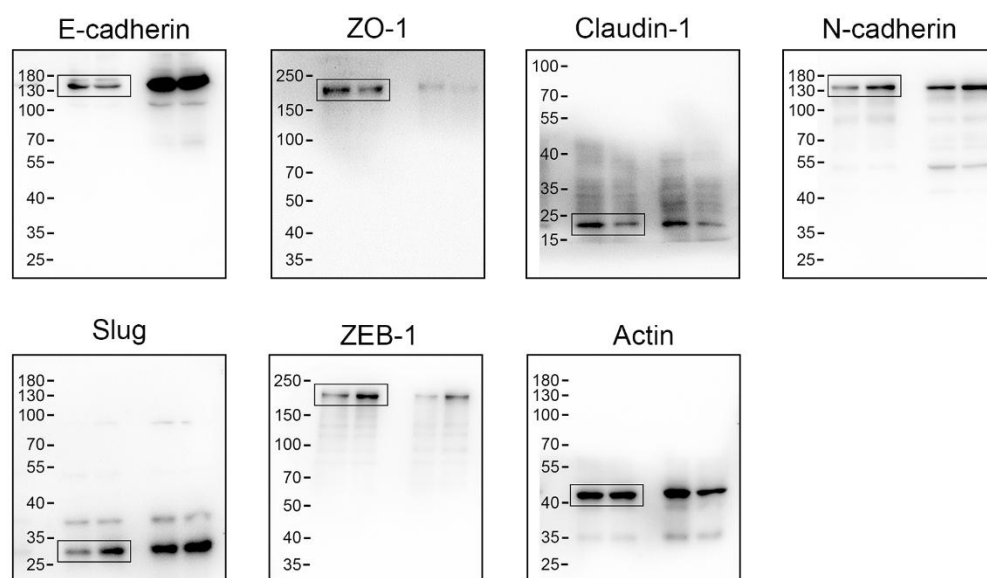

Figure 1-figure supplement 3, Source Data 1. Original membranes corresponding to Figure 1-figure supplement 3, panel B and F, indicating the relevant bands.
