# Supplementary material for: TAK1-mediated phosphorylation of PLCE1 represses PIP2 hydrolysis to impede esophageal squamous cancer metastasis
Source: eLife journal article supplement (doi:10.7554/elife.97373), 2024-06-03
Supplement: fig1-figsupp4-data2 [file elife-97373-fig1-figsupp4-data2-v1.zip]

**Figure 1–Figure Supplement 4A**

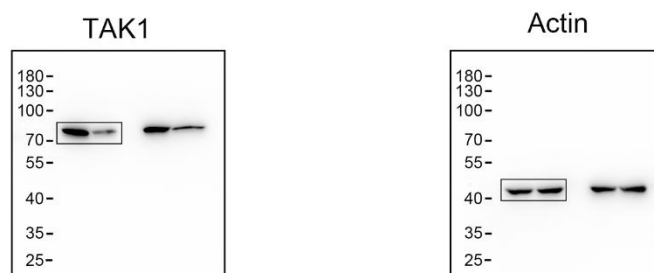

**Figure 1–Figure Supplement 4E**

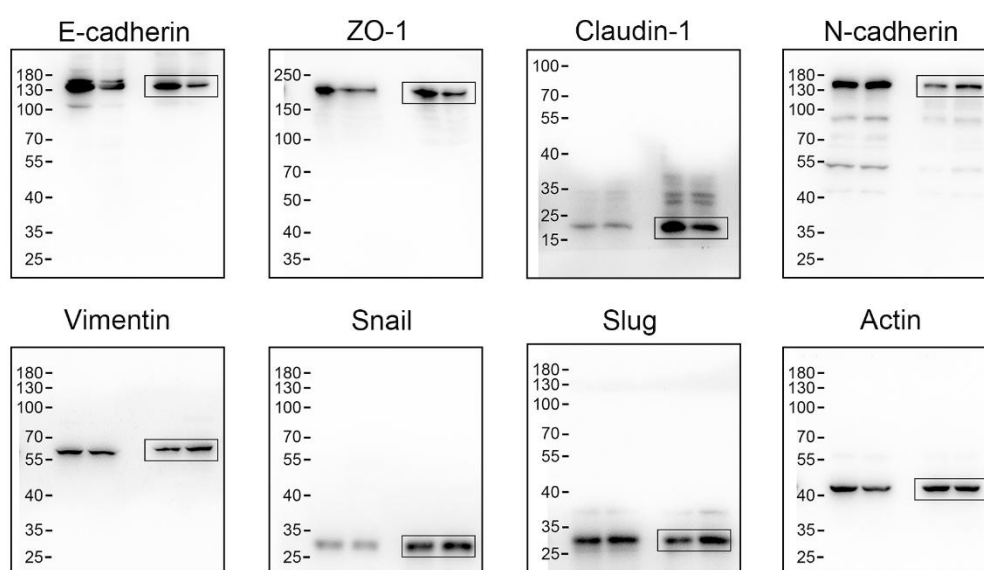

Figure 1-figure supplement 4, Source Data 1. Original membranes corresponding to Figure 1-figure supplement 4, panel A and E, indicating the relevant bands.
