# Supplementary material for: TAK1-mediated phosphorylation of PLCE1 represses PIP2 hydrolysis to impede esophageal squamous cancer metastasis
Source: eLife journal article supplement (doi:10.7554/elife.97373), 2024-06-03
Supplement: fig2-data2 [file elife-97373-fig2-data2-v1.zip]

**Figure 2B**

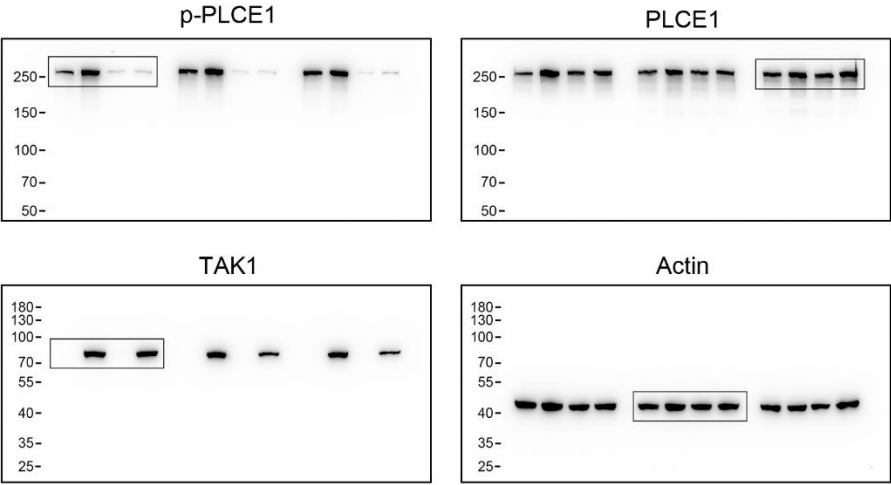

**Figure 2C**

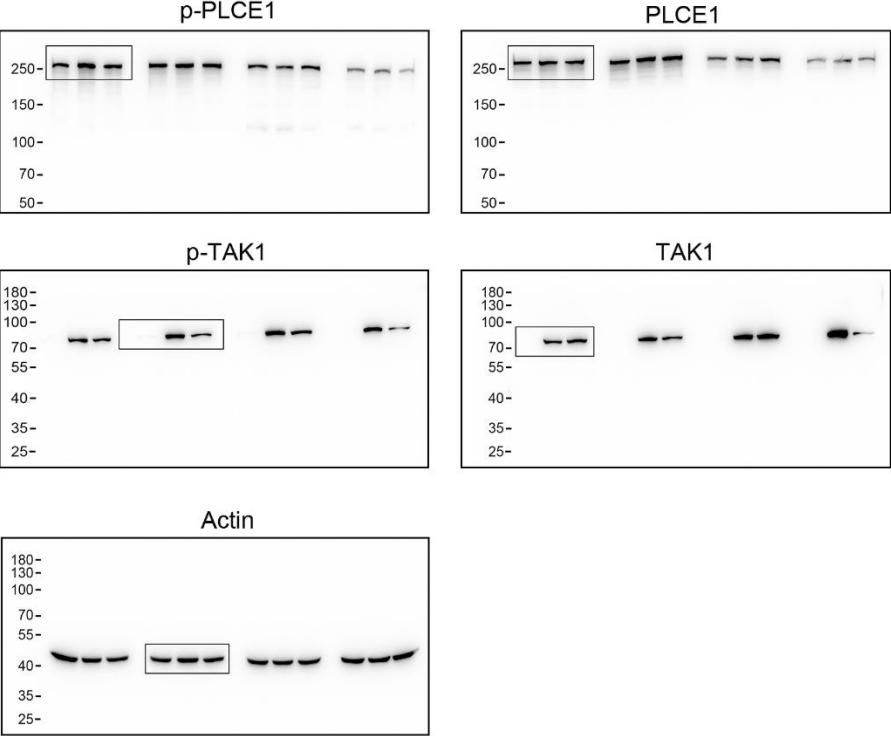

Figure 2D

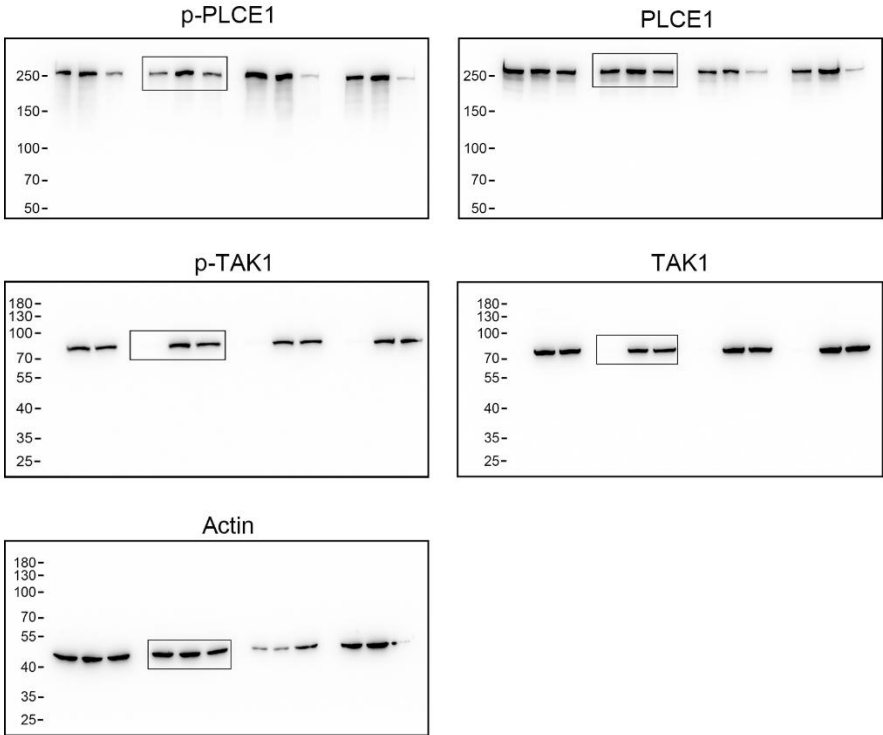

Figure 2E

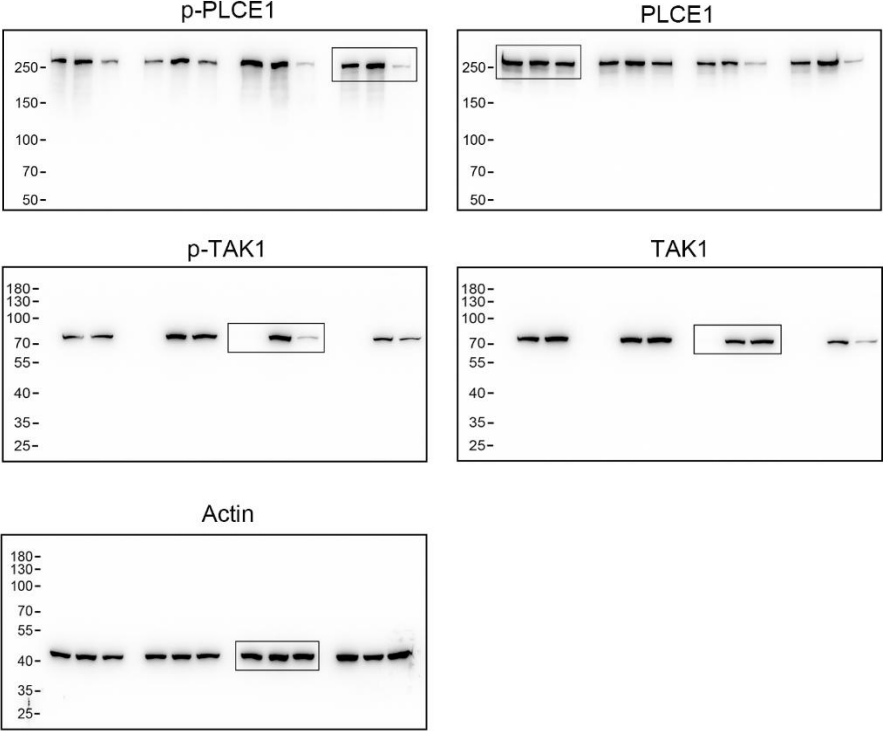

**Figure 2I**

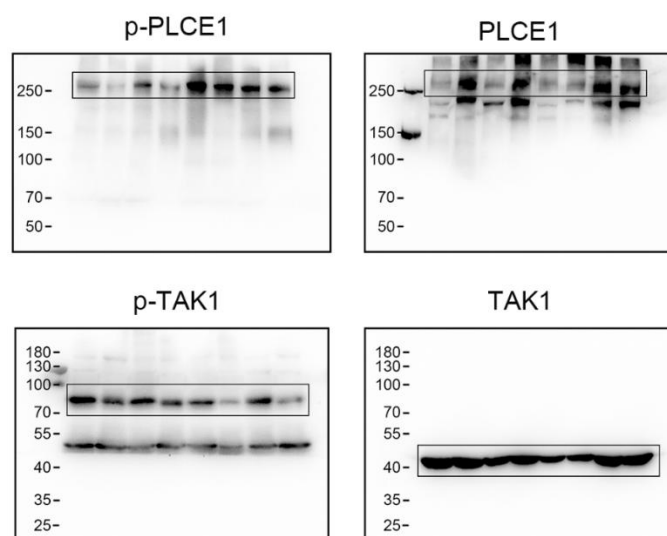

Figure 2, Source Data 1. Original membranes corresponding to Figure 2, panel B, C, D, E and I, indicating the relevant bands.
