# Supplementary material for: TAK1-mediated phosphorylation of PLCE1 represses PIP2 hydrolysis to impede esophageal squamous cancer metastasis
Source: eLife journal article supplement (doi:10.7554/elife.97373), 2024-06-03
Supplement: fig2-figsupp1-data1 [file elife-97373-fig2-figsupp1-data1-v1.zip]

**Figure 2–Figure Supplement 1A**

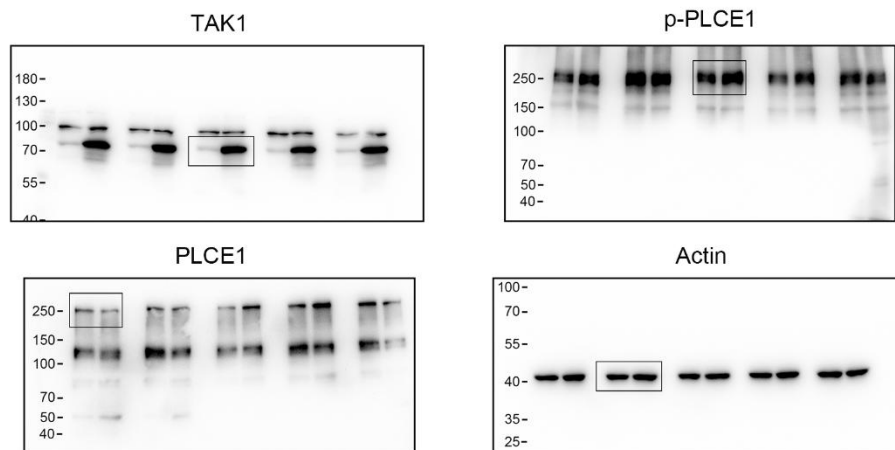

**Figure 2–Figure Supplement 1B**

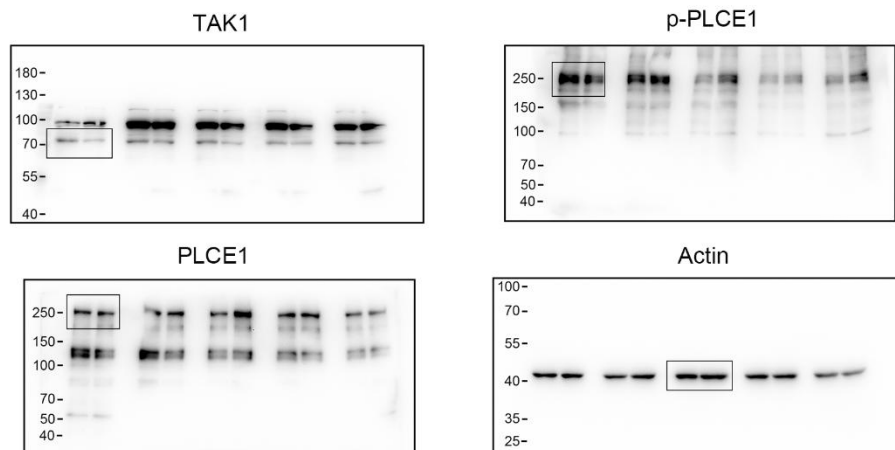

**Figure 2–Figure Supplement 1C**

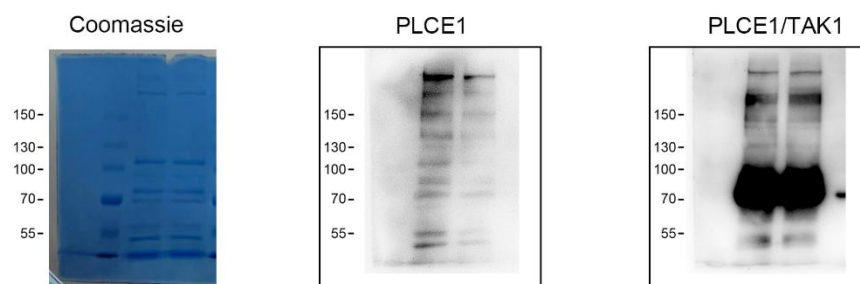

Figure 2-figure supplement 1, Source Data 1. Original membranes corresponding to Figure 2-figure supplement 1, panel A, B and C, indicating the relevant bands.
