# Supplementary material for: TAK1-mediated phosphorylation of PLCE1 represses PIP2 hydrolysis to impede esophageal squamous cancer metastasis
Source: eLife journal article supplement (doi:10.7554/elife.97373), 2024-06-03
Supplement: fig3-data2 [file elife-97373-fig3-data2-v1.zip]

**Figure 3A**

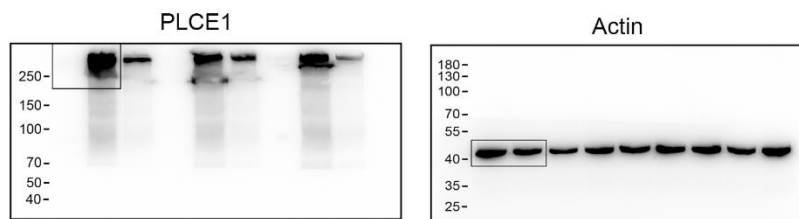

**Figure 3D**

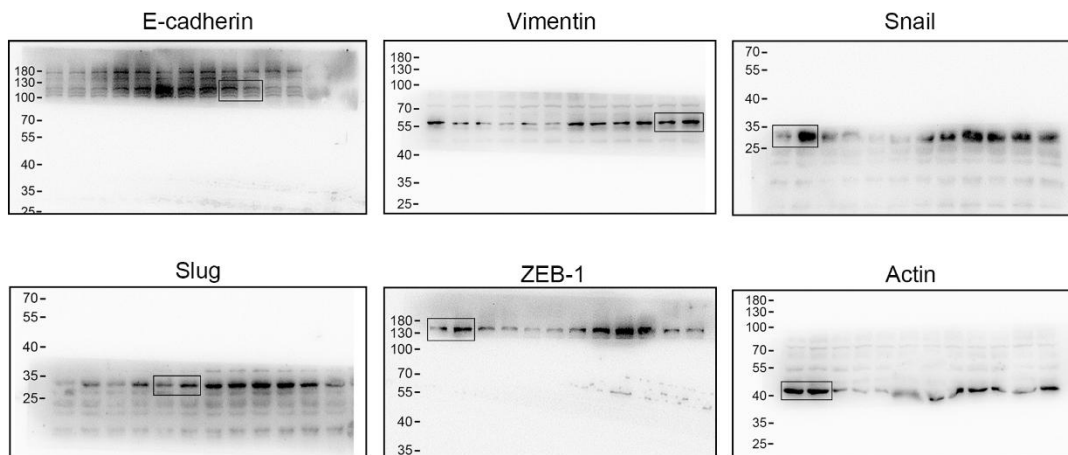

**Figure 3F**

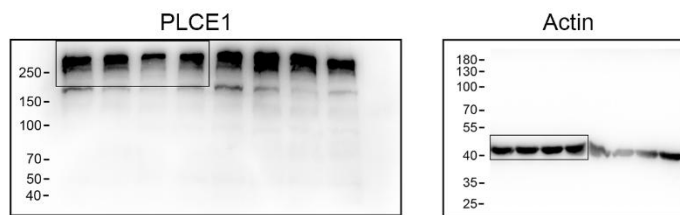

**Figure 3I**

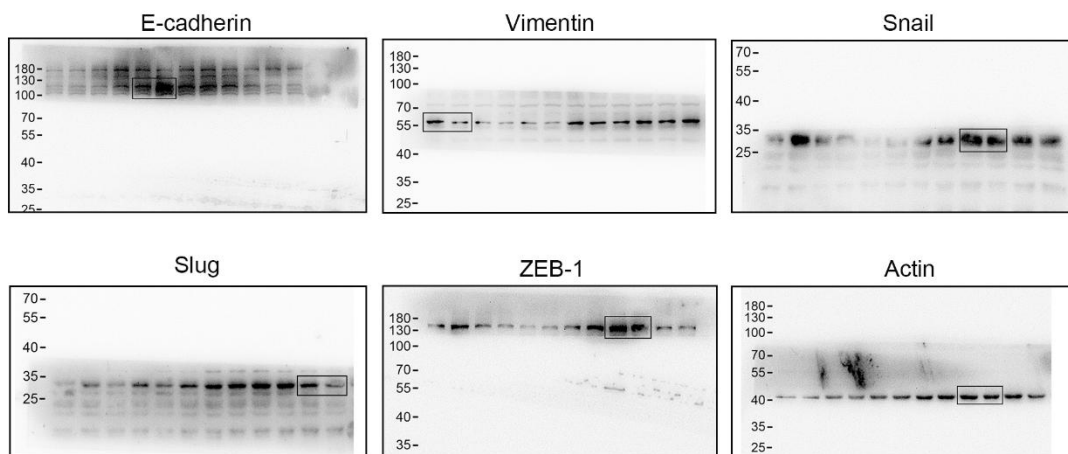

Figure 3, Source Data 1. Original membranes corresponding to Figure 3, panel A, D, F and I, indicating the relevant bands.
