# Supplementary material for: TAK1-mediated phosphorylation of PLCE1 represses PIP2 hydrolysis to impede esophageal squamous cancer metastasis
Source: eLife journal article supplement (doi:10.7554/elife.97373), 2024-06-03
Supplement: fig5-data1 [file elife-97373-fig5-data1-v1.zip]

**Figure 5A**

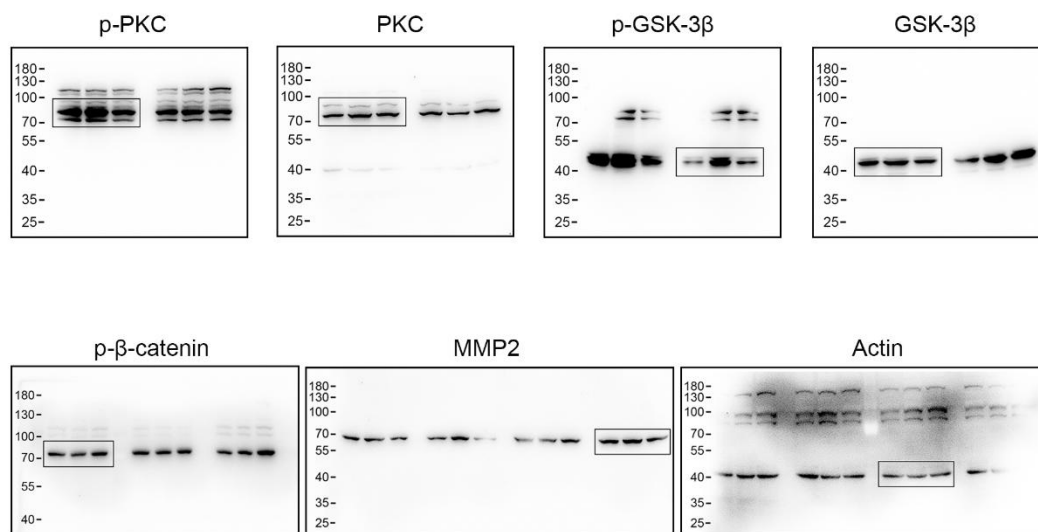

**Figure 5B**

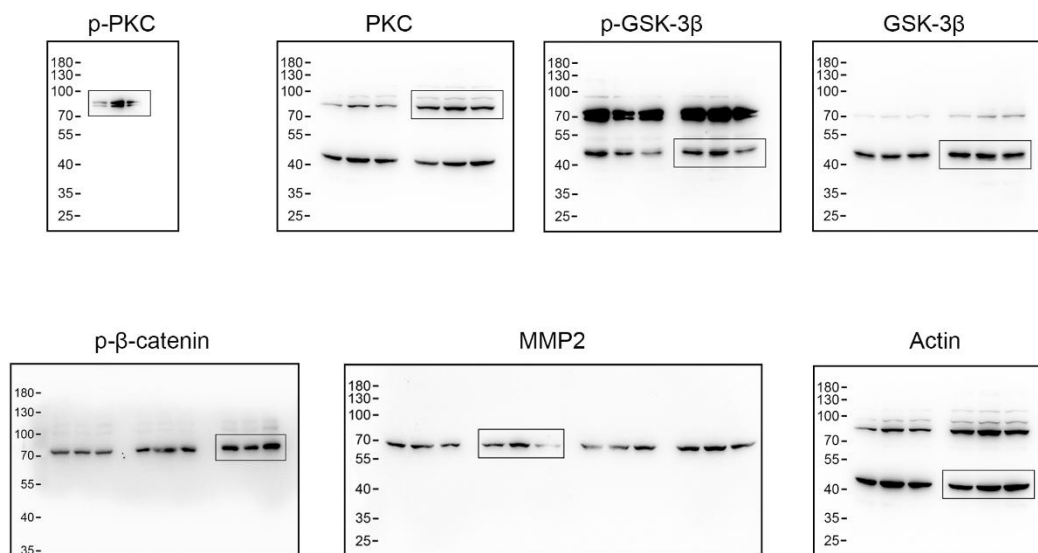

Figure 5C

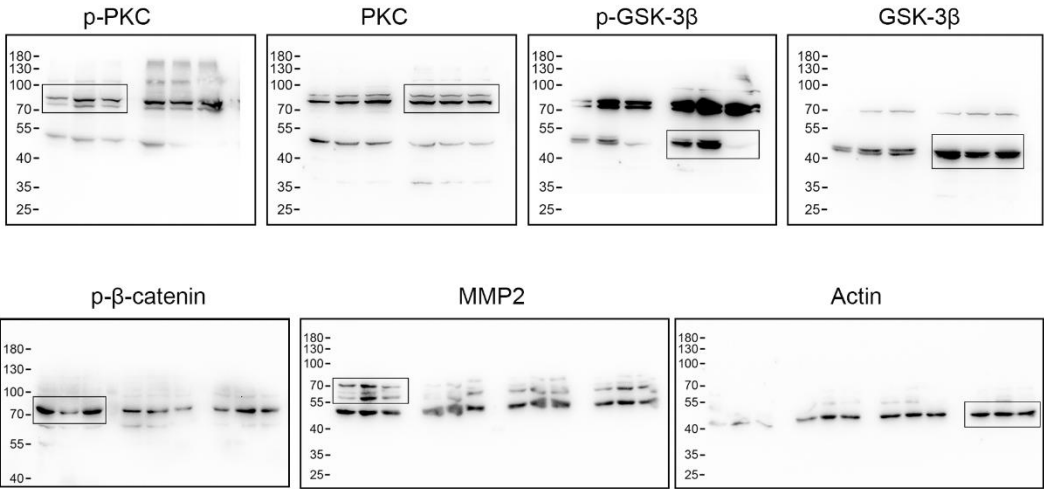

Figure 5E

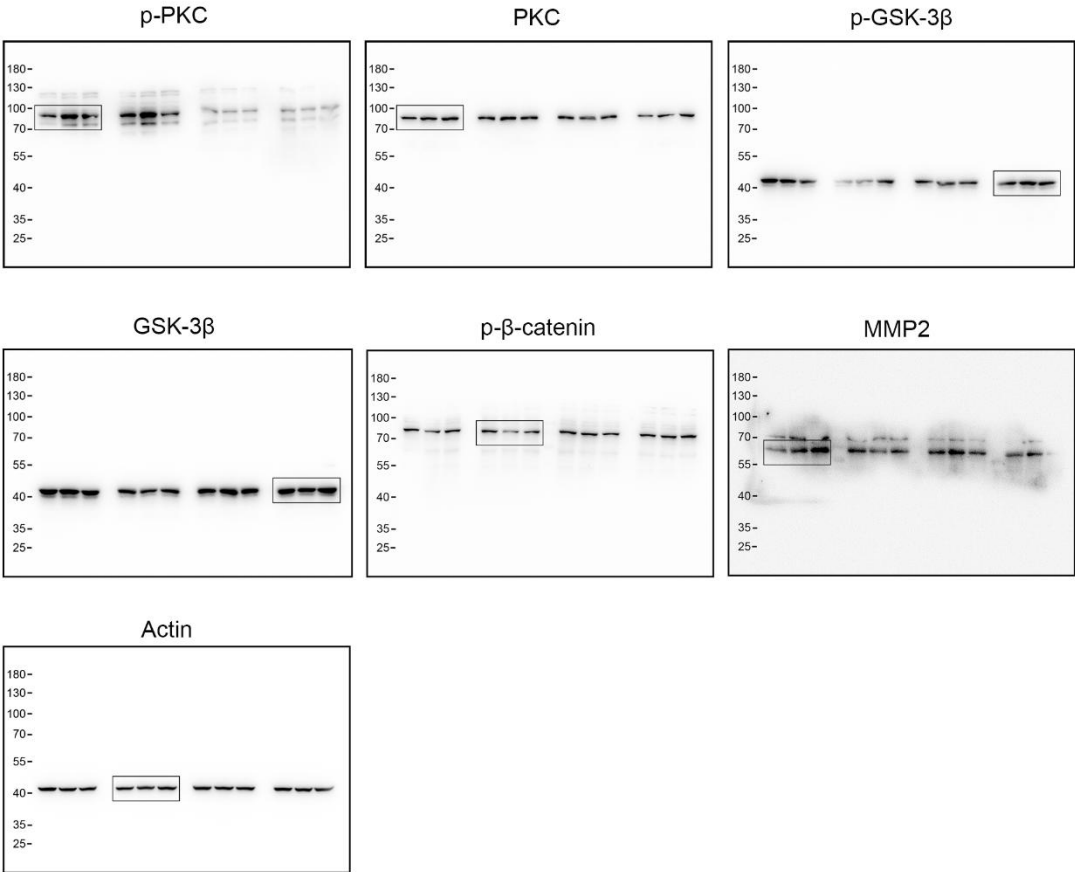

**Figure 5G**

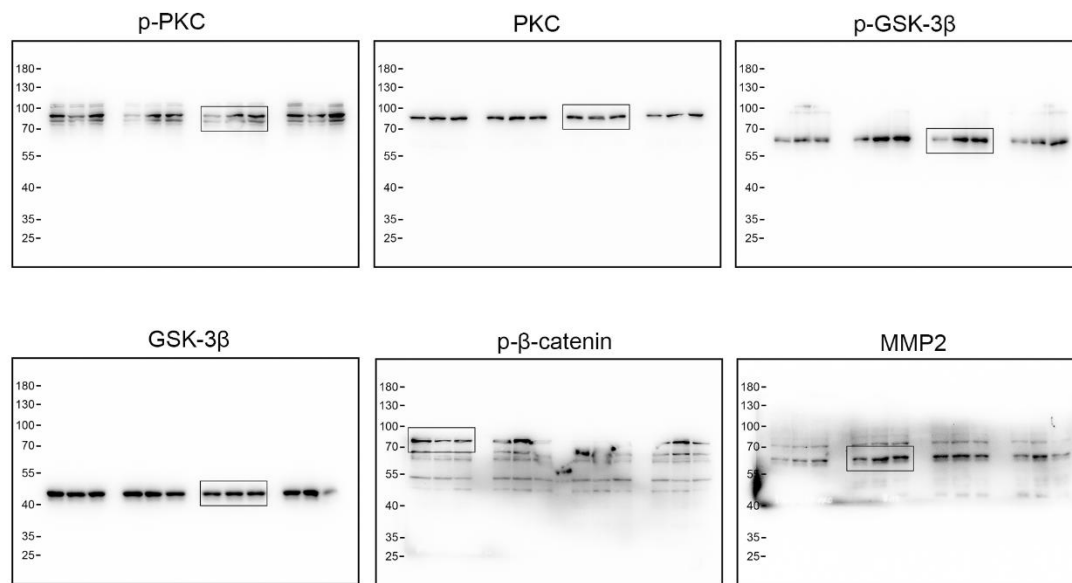

**Figure 5H**

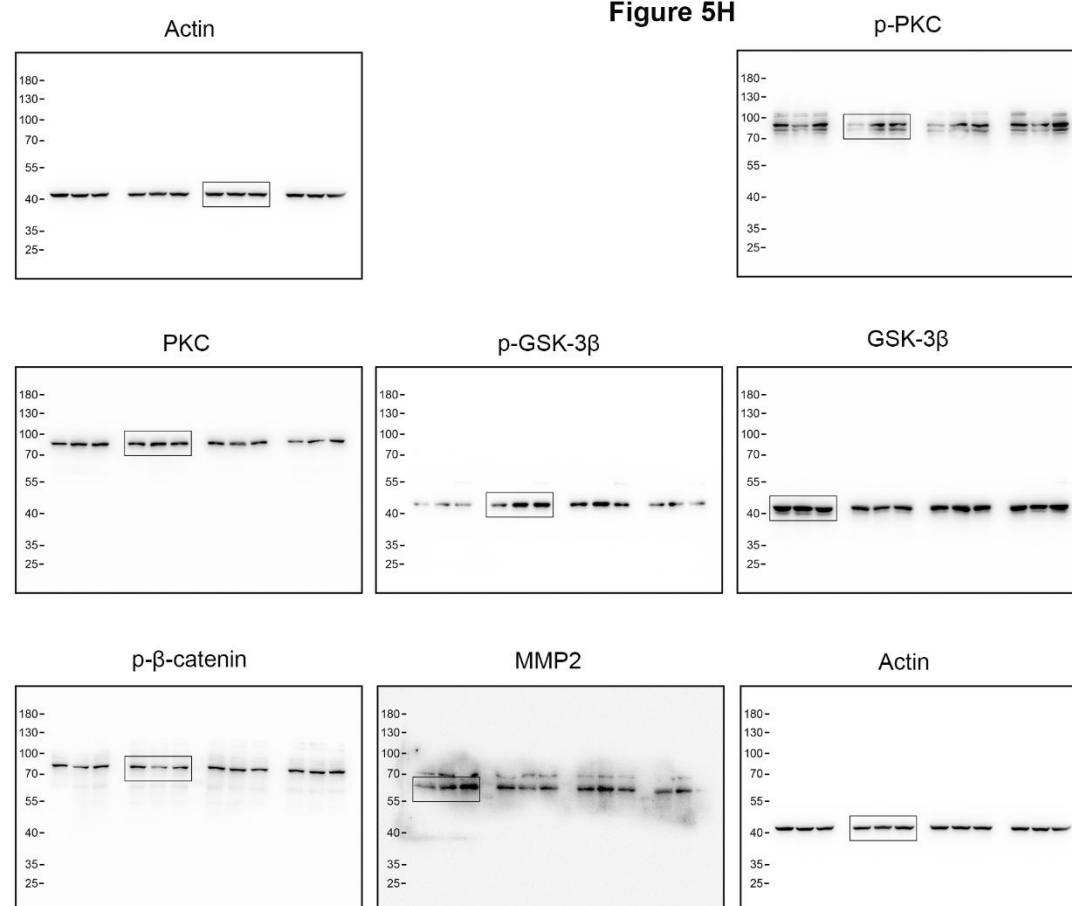

Figure 5, Source Data 1. Original membranes corresponding to Figure 5, panel A, B, C, E, G and H, indicating the relevant bands.
