# Supplementary material for: TAK1-mediated phosphorylation of PLCE1 represses PIP2 hydrolysis to impede esophageal squamous cancer metastasis
Source: eLife journal article supplement (doi:10.7554/elife.97373), 2024-06-03
Supplement: fig6-data2 [file elife-97373-fig6-data2-v1.zip]

**Figure 6D**

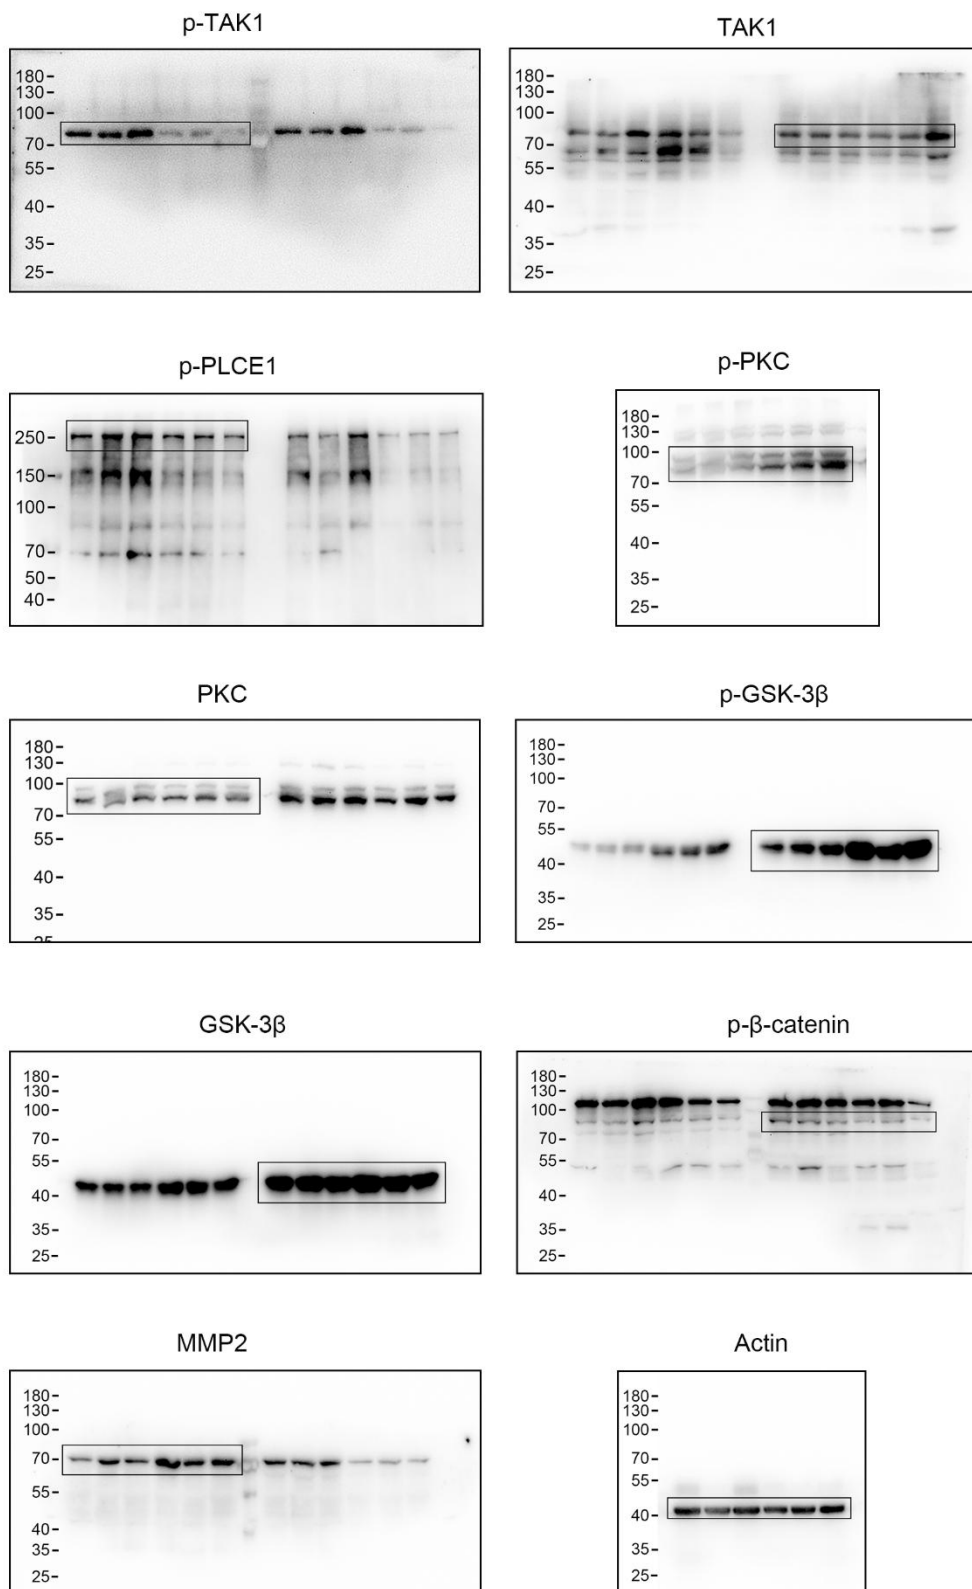

Figure 6, Source Data 1. Original membranes corresponding to Figure 6, panel D, indicating the relevant bands.
