# Supplementary material for: TAK1-mediated phosphorylation of PLCE1 represses PIP2 hydrolysis to impede esophageal squamous cancer metastasis
Source: eLife. 2025 Apr 23;13:RP97373. doi: 10.7554/eLife.97373 (PMC12017773; doi:10.7554/eLife.97373)
Supplement: Figure 1—figure supplement 1—source data 1. [file elife-97373-fig1-figsupp1-data1.xlsx]

## Sheet: Figure S1C
	EV			TAK1
E-cadherin	0.0893531	0.105494	0.118679	1.11716	1.09272	1.09727
ZO-1	0.67047	0.696667	0.677329	1.27375	1.23622	1.20685
N-cadherin	1.00505	0.835883	0.835694	0.748937	0.683627	0.691402
Vimentin	0.814234	0.891818	0.899116	0.508579	0.681204	0.712954
ZEB-1	0.824859	0.699951	0.751189	0.367175	0.31667	0.445372

## Sheet: Figure S1D
	EV				TAK1
CDH1	0.839242	1.15674	1.12233	0.917818	3.13276	1.3186	2.8882	3.13377
TJP1	1.31265	1.29234	1.23165	0.478617	2.57877	3.142	2.77895	4.13069
CLDN1	1.30225	1.27125	0.858688	0.703458	0.840491	0.86043	0.54488	0.631238
CDH2	0.972054	0.683685	0.775154	1.62263	0.465229	0.150592	0.177691	0.641424
VIM	0.990147	1.35111	0.914424	0.817451	0.477514	0.993187	0.404476	0.491075
SNAl1	1.43991	1.35491	0.865343	0.592333	0.556463	0.68085	0.70155	0.70782
ZEB1	1.26418	0.939906	0.926213	0.908647	0.75597	0.451832	0.397656	0.353034
