# Supplementary material for: TAK1-mediated phosphorylation of PLCE1 represses PIP2 hydrolysis to impede esophageal squamous cancer metastasis
Source: eLife. 2025 Apr 23;13:RP97373. doi: 10.7554/eLife.97373 (PMC12017773; doi:10.7554/eLife.97373)
Supplement: Figure 1—figure supplement 2—source data 1. [file elife-97373-fig1-figsupp2-data1.xlsx]

## Sheet: Figure S2B
	NC					Map3k7 siRNA-3#
24h	20.1327	20.4544	17.1563	19.0271	29.056	44.6595	44.9971	49.3797	51.096	43.1316
48h	34.096	27.585	38.7686	26.1508	33.7034	77.0897	71.4623	83.7117	83.7125	79.0514

## Sheet: Figure S2C
	NC			Map3k7 siRNA-3#
E-cadherin	0.857249	0.844352	0.841965	0.186527	0.19363	0.163834
Claudin-1	1.04171	0.895378	1.03285	0.77369	0.785466	0.62611
N-cadherin	0.477317	0.516488	0.502313	0.939499	0.95959	0.951293
Vimentin	0.551321	0.465799	0.51769	1.07244	1.03442	0.939645
Snail	0.406784	0.309917	0.431637	0.841211	0.804993	0.835758
Slug	0.73141	0.733934	0.959511	1.07425	1.06766	1.07874

## Sheet: Figure S2D
	NC				Map3k7 siRNA-3#
CDH1	0.754007	1.10728	1.27903	0.936453	0.657868	0.451251	0.381788	0.495673
CTNNB1	1.25322	1.15146	0.85212	0.813251	1.06734	1.04154	1.03224	0.905789
CLDN1	1.18575	1.03855	0.928797	0.938371	0.72639	0.705094	0.66381	0.773624
CDH2	0.952485	1.05557	1.02814	0.967394	1.32714	2.77208	2.19391	1.83224
VIM	1.13702	1.55878	0.84361	0.668811	1.25582	1.63643	1.1133	1.14247
SNAL1	0.966207	1.05445	0.989916	0.991524	1.97282	2.22732	1.81786	1.74024
SNAL2	1.08853	1.17299	1.081	0.724514	2.09816	2.12822	1.67597	0.730378
ZEB1	0.86716	1.17199	1.00578	0.978314	1.23962	0.948642	0.871867	0.818558
