# Supplementary material for: TAK1-mediated phosphorylation of PLCE1 represses PIP2 hydrolysis to impede esophageal squamous cancer metastasis
Source: eLife. 2025 Apr 23;13:RP97373. doi: 10.7554/eLife.97373 (PMC12017773; doi:10.7554/eLife.97373)
Supplement: Figure 1—figure supplement 3—source data 1. [file elife-97373-fig1-figsupp3-data1.xlsx]

## Sheet: Figure S3A
LV-NC	LV-shRNA
0.897095	0.170361
0.954842	0.098527
1.16743	0.03892

## Sheet: Figure S3B
LV-NC	LV-shRNA
1.15805	0.469951
0.92325	0.259
0.850101	0.21733

## Sheet: Figure S3D
Migration			Invasion
LV-NC	LV-shRNA		LV-NC	LV-shRNA
200	700		46	120
150	452		39	100
240	572		48	93
168	710		34	143
308	500		35	108

## Sheet: Figure S3E
	LV-NC					LV-shRNA
24h	36.162	30.0136	37.6837	37.6609	32.767	53.0299	48.9323	58.1039	56.1974	47.9646
48h	65.8266	66.6357	70.6721	65.4957	63.4321	92.3598	89.1164	71.5866	73.306	84.0537

## Sheet: Figure S3G
	LV-NC			LV-shRNA
E-cadherin	0.830666	0.82328	0.826317	0.494994	0.497367	0.507403
ZO-1	1.03418	0.97345	0.979794	0.520911	0.460818	0.436244
Claudin-1	1.10466	1.08043	1.11449	0.398572	0.408713	0.395082
N-cadherin	0.447909	0.384381	0.388457	0.901912	0.893336	0.921312
Slug	0.508846	0.571663	0.413945	0.921987	1.00876	0.925255
ZEB-1	0.578498	0.676084	0.518204	0.936132	0.95601	0.94479

## Sheet: Figure S3H
	LV-NC				LV-shRNA
CDH1	0.897943	1.00532	1.24096	0.892671	0.917538	0.614333	0.383517	0.528172
CTNNB1	1.33438	0.933657	0.883275	0.908734	1.12715	1.25299	1.00127	0.823977
TJP1	1.30221	1.11516	0.60557	1.13715	0.652866	0.384598	0.685911	0.75344
CLDN1	1.31638	1.20464	1.00916	0.62489	0.623501	0.502182	0.428934	0.734977
CDH2	1.06711	1.29877	1.04462	0.690711	2.01924	3.42703	2.29728	3.63756
VIM	0.959654	1.33529	0.705632	1.10594	1.00336	0.760719	1.16357	0.844016
SNAl1	1.04832	0.932007	0.931328	1.09896	1.27643	1.22771	0.686898	0.65437
SNAl2	1.20682	0.636654	0.952535	1.36638	1.08765	1.18166	1.98734	1.46965
ZEB1	1.21286	1.2622	1.08115	0.604195	1.85117	1.7554	1.48407	2.09266
