# Supplementary material for: TAK1-mediated phosphorylation of PLCE1 represses PIP2 hydrolysis to impede esophageal squamous cancer metastasis
Source: eLife. 2025 Apr 23;13:RP97373. doi: 10.7554/eLife.97373 (PMC12017773; doi:10.7554/eLife.97373)
Supplement: Figure 1—figure supplement 4—source data 1. [file elife-97373-fig1-figsupp4-data1.xlsx]

## Sheet: Figure S4A
Mock	Map3k7 gRNA
1.3193	0.392935
1.30601	0.348314
1.31269	0.426762

## Sheet: Figure S4C
Migration			Invasion
Mock	Map3k7 gRNA		Mock	Map3k7 gRNA
123	197		63	285
135	243		99	340
145	233		88	198
147	192		81	180
136	215		94	300

## Sheet: Figure S4D
	Mock					Map3k7 gRNA
24h	46.7423	40.5643	44.5726	50.0704	49.6855	50.8507	53.1085	59.0873	57.0142	53.6709
48h	71.5232	73.2507	68.4162	64.7063	55.8936	97.4386	97.5272	93.5729	85.3398	96.6706

## Sheet: Figure S4F
	Mock			Map3k7 gRNA
E-cadherin	0.983108	0.941557	1.05237	0.404921	0.496013	0.52491
ZO-1	0.803438	0.779573	0.831074	0.5215	0.513686	0.54504
Claudin-1	0.862448	0.958154	0.904197	0.713637	0.705244	0.596444
N-cadherin	0.561322	0.457579	0.572057	1.09474	1.24822	1.15506
Vimentin	0.720101	0.668667	0.575009	1.07246	1.08863	1.12776
Snail	0.719923	0.737865	0.695214	0.903091	1.12172	1.04838
Slug	0.613467	0.570609	0.430361	1.09401	1.07278	0.719187

## Sheet: Figure S4G
	Mock				Map3k7 gRNA
CDH1	1.03281	1.20647	0.673759	1.19113	0.20827	0.22586	0.162685	0.250301
TJP1	1.57948	0.946353	0.506839	1.31996	0.176864	0.181992	0.398659	0.41085
CLDN1	1.18052	0.912241	0.81768	1.13563	0.543783	0.281542	0.3089	1.00117
CDH2	1.44573	0.608281	1.03174	1.10215	1.97691	9.38158	5.36957	4.08369
VIM	0.602352	1.32157	1.3279	0.946001	3.41759	2.14356	2.24007	2.08589
SNAl1	0.926534	1.58756	0.349298	1.94631	5.88309	6.98243	4.54208	1.63142
SNAl2	0.886132	1.68411	0.789058	0.849225	4.99947	4.96796	2.94059	3.26786
ZEB1	1.18095	1.04015	0.96203	0.846223	0.312597	0.565064	0.589459	1.02527
