# Supplementary material for: TAK1-mediated phosphorylation of PLCE1 represses PIP2 hydrolysis to impede esophageal squamous cancer metastasis
Source: eLife. 2025 Apr 23;13:RP97373. doi: 10.7554/eLife.97373 (PMC12017773; doi:10.7554/eLife.97373)
Supplement: Figure 1—figure supplement 5—source data 1. [file elife-97373-fig1-figsupp5-data1.xlsx]

## Sheet: Figure S5C
Migration			Invasion
DMSO	Oxo		DMSO	Oxo
265	440		185	221
300	500		161	243
241	395		155	234
263	400		200	260
290	472		169	248

## Sheet: Figure S5E
	DMSO					Oxo
24h	27.3002	29.3754	28.9158	32.2172	23.9028	40.3249	29.6574	31.3761	39.738	43.7309
48h	86.5532	74.608	72.8751	71.515	74.3884	85.915	88.198	89.4858	98.2274	99.5088
