# Supplementary material for: TAK1-mediated phosphorylation of PLCE1 represses PIP2 hydrolysis to impede esophageal squamous cancer metastasis
Source: eLife. 2025 Apr 23;13:RP97373. doi: 10.7554/eLife.97373 (PMC12017773; doi:10.7554/eLife.97373)
Supplement: Figure 1—source data 1. [file elife-97373-fig1-data1.xlsx]

## Sheet: Figure 1A
EV	TAK1
0.0813915	0.94414
0.083926	0.930342
0.103318	0.902923

## Sheet: Figure 1C
Migration			Invasion
EV	TAK1		EV	TAK1
1600	800		1120	600
1300	800		1200	600
1350	700		930	700
1290	620		1300	820

## Sheet: Figure 1D
	EV					TAK1
24h	19.1375	3.06695	27.5162	31.1354	21.9923	16.0621	2.34349	12.8172	17.1157	14.7327
48h	39.2685	48.8755	69.2293	61.1261	60.5172	32.3375	34.3043	43.6656	34.7958	50.1337

## Sheet: Figure 1H
Migration			Invasion
NC	Map3k7 siRNA-3#		NC	Map3k7 siRNA-3#
672	1012		356	688
640	1071		270	648
700	1045		281	724
718	950		300	730
740	890		320	700
