# Supplementary material for: TAK1-mediated phosphorylation of PLCE1 represses PIP2 hydrolysis to impede esophageal squamous cancer metastasis
Source: eLife. 2025 Apr 23;13:RP97373. doi: 10.7554/eLife.97373 (PMC12017773; doi:10.7554/eLife.97373)
Supplement: Figure 2—source data 1. [file elife-97373-fig2-data1.xlsx]

## Sheet: Figure 2H
TAK1	p-PLCE1
5.3404	4.49267
5.38546	3.52346
3.15872	4.45984
3.74982	5.17277
3.83445	4.06738
4.98076	3.9937
5.07861	4.8757
5.93017	4.62389
5.16296	4.65176
5.33235	3.80088
5.11607	3.86326
5.93384	5.47339
5.56955	6.18288
6.03543	5.53052
5.71788	4.9827
5.87513	3.88638
6.42313	5.47473
5.70366	4.49903
5.9507	4.43044
6.01396	5.53965
7.98192	5.35203
10.2093	6.79691
6.54379	5.05277
7.51633	6.60692
6.89052	5.8074
7.03206	5.862
7.05443	5.11723
7.15551	7.05571
6.69758	5.41837
7.31288	5.08326
7.67396	7.80717
7.67031	7.69304
8.8848	7.43369
7.69482	6.25934
7.30136	5.42412
11.1373	6.85409
9.89631	8.54101
2.98728	4.00937
3.0897	3.31739
13.2617	8.18207
