# Supplementary material for: TAK1-mediated phosphorylation of PLCE1 represses PIP2 hydrolysis to impede esophageal squamous cancer metastasis
Source: eLife. 2025 Apr 23;13:RP97373. doi: 10.7554/eLife.97373 (PMC12017773; doi:10.7554/eLife.97373)
Supplement: Figure 3—figure supplement 1—source data 1. [file elife-97373-fig3-figsupp1-data1.xlsx]

## Sheet: Figure S1C
	EV			PLCE1
E-cadherin	0.913122	1.04194	1.03324	0.383986	0.508198	0.508946
Vimentin	0.701299	0.569829	0.68485	0.906294	0.907661	0.916963
Snail	0.57477	0.187409	0.186966	1.16057	0.920012	0.917767
Slug	0.507723	0.392593	0.408103	0.864209	0.997566	0.770592
ZEB-1	0.481669	0.345943	0.221707	1.00116	0.896713	0.892883

## Sheet: Figure S1D
	EV			PLCE1
CDH1	1.31951	0.895025	0.846745	0.773782	0.846745	0.628507
TJP1	1.00696	0.840896	1.18099	0.965936	1.20581	1.10957
CLDN1	0.493576	0.429337	0.434364	0.376064	0.38371	0.521405
CDH2	0.97041	1.13813	0.905425	1.74917	1.4406	0.97041
VIM	1.08925	1.00928	0.909618	1.54043	1.80667	1.42734
SNAI1	1.06683	1.08173	0.866537	1.7818	1.3692	1.28639
SNAI2	1.05702	1.05702	0.895025	1.34723	1.75321	1.33793
ZEB1	0.990801	0.905425	1.11471	1.12246	1.17827	1.15402
