# Supplementary material for: TAK1-mediated phosphorylation of PLCE1 represses PIP2 hydrolysis to impede esophageal squamous cancer metastasis
Source: eLife. 2025 Apr 23;13:RP97373. doi: 10.7554/eLife.97373 (PMC12017773; doi:10.7554/eLife.97373)
Supplement: Figure 3—figure supplement 2—source data 1. [file elife-97373-fig3-figsupp2-data1.xlsx]

## Sheet: Figure S2C
	NC			Plce1 siRNA-2#
E-cadherin	0.682311	0.630691	0.524902	1.53062	1.40488	1.20054
Vimentin	0.813689	0.926918	1.03838	0.483349	0.64843	0.568888
Snail	1.07184	1.05051	1.15423	0.879925	0.533197	0.701337
Slug	1.05269	0.938415	0.796092	0.405163	0.548875	0.32198
ZEB-1	1.12427	1.11784	1.22917	0.786085	0.634443	0.770629

## Sheet: Figure S2D
	NC			Plce1 siRNA-2#
CDH1	1.03527	0.742262	1.30134	1.38511	1.62451	1.54757
TJP1	1.1434	0.819794	1.06683	1.62826	1.61702	2.07532
CLDN1	0.80478	1.01866	1.21982	1.20303	1.41095	1.38191
CDH2	1.10701	1.08423	0.833161	0.163421	0.234339	0.254664
VIM	0.833161	1.2283	0.97716	0.793701	0.827406	0.799221
SNAl1	1.25411	0.911722	0.874583	1.09177	0.856584	1.00463
SNAl2	1.10957	0.986233	0.913831	0.615572	0.503478	0.473029
ZEB1	0.733736	1.12766	1.2086	0.890899	0.890899	1.02337
