# Supplementary material for: TAK1-mediated phosphorylation of PLCE1 represses PIP2 hydrolysis to impede esophageal squamous cancer metastasis
Source: eLife. 2025 Apr 23;13:RP97373. doi: 10.7554/eLife.97373 (PMC12017773; doi:10.7554/eLife.97373)
Supplement: Figure 3—figure supplement 3—source data 1. [file elife-97373-fig3-figsupp3-data1.xlsx]

## Sheet: Figure S3B
Migration			Invasion
NC	m-3M3FBS		NC	m-3M3FBS
140	184		77	167
120	189		110	165
134	202		78	170
119	215		68	157
106	230		80	154

## Sheet: Figure S3D
	DMSO			m-3M3FBS
24h	31.0511	21.251	34.4318	44.6341	47.5031	58.5391
48h	78.319	70.3285	72.632	89.5706	90.3799	85.5816
