# Supplementary material for: TAK1-mediated phosphorylation of PLCE1 represses PIP2 hydrolysis to impede esophageal squamous cancer metastasis
Source: eLife. 2025 Apr 23;13:RP97373. doi: 10.7554/eLife.97373 (PMC12017773; doi:10.7554/eLife.97373)
Supplement: Figure 3—figure supplement 4—source data 1. [file elife-97373-fig3-figsupp4-data1.xlsx]

## Sheet: Figure S4B
Migration			Invasion
DMSO	U-73122		DMSO	U73122
191	46		310	92
192	35		280	98
223	28		279	53

## Sheet: Figure S4D
	DMSO			U-73122
24h	87.6121	87.83	87.4164	82.4888	82.8381	83.3307
48h	93.6163	93.4322	96.5819	86.9049	88.1996	88.6101
