# Supplementary material for: TAK1-mediated phosphorylation of PLCE1 represses PIP2 hydrolysis to impede esophageal squamous cancer metastasis
Source: eLife. 2025 Apr 23;13:RP97373. doi: 10.7554/eLife.97373 (PMC12017773; doi:10.7554/eLife.97373)
Supplement: Figure 3—source data 1. [file elife-97373-fig3-data1.xlsx]

## Sheet: Figure 3B
Migration			Invasion
EV	PLCE1		EV	PLCE1
81	193		85	198
39	144		137	168
86	164		148	218
55	166		81	221
65	184		71	179

## Sheet: Figure 3C
	EV					PLCE1
24h	29.967	25.0744	30.6007	24.4504	27.109	34.6613	31.8758	33.659	35.576	38.2257
48h	86.9971	81.234	79.1462	78.3412	77.1424	97.772	91.1703	91.6894	97.3905	97.9049

## Sheet: Figure 3E
	Plce1 siRNAs
NC	1#	2#	3#
1.00696	0.273573	0.325335	0.479632
0.926588	0.275476	0.301452	0.514057
1.07177	0.314253	0.336808	0.543367

## Sheet: Figure 3F
	Plce1 siRNAs
NC	1#	2#	3#
0.921993	0.71422	0.668643	0.597979
0.989047	0.554497	0.418168	0.383531
1.08896	0.744352	0.511045	0.662547

## Sheet: Figure 3G
Migration				Invasion
NC	Plce1 siRNA-2#			NC	Plce1 siRNA-2#
218	116			190	122
154	136			178	109
203	167			210	106
200	161			182	145
205	140			202	117

## Sheet: Figure 3H
	NC			Plce1 siRNA-2#
24h	34.809	22.544	22.7508	12.3919	11.6721	16.7022
48h	44.7491	47.3365	33.4988	28.0881	33.5987	34.6468
72h	97.3389	94.6491	99.5918	53.2579	64.2564	62.7619
