# Supplementary material for: TAK1-mediated phosphorylation of PLCE1 represses PIP2 hydrolysis to impede esophageal squamous cancer metastasis
Source: eLife. 2025 Apr 23;13:RP97373. doi: 10.7554/eLife.97373 (PMC12017773; doi:10.7554/eLife.97373)
Supplement: Figure 4—figure supplement 1—source data 1. [file elife-97373-fig4-figsupp1-data1.xlsx]

## Sheet: Figure S1B
Migration						Invasion
EV	PLCE1	PLCE1+TAK1	PLCE1 S1060A	PLCE1 S1060A+TAK1		EV	PLCE1	PLCE1+TAK1	PLCE1 S1060A	PLCE1 S1060A+TAK1
296	679	244	754	800		184	443	336	528	706
330	666	300	736	798		229	476	264	496	667
241	594	326	656	834		241	542	190	630	598
209	531	239	571	710		159	486	196	579	683
315	550	272	522	689		230	606	255	590	644

## Sheet: Figure S1D
	EV					PLCE1					PLCE1+TAK1					PLCE1 S1060A					PLCE1 S1060A+TAK1
24h	40.0285	38.5569	35.1214	35.3943	31.338	44.2024	61.4228	59.0575	58.0301	58.806	33.6284	31.6912	32.0498	28.4537	28.8069	56.414	59.78	57.1364	58.014	62.691	60.3258	55.6327	55.3812	58.7258	60.4649
48h	81.4526	79.9649	78.6913	69.835	73.2651	94.8842	94.0173	97.9933	94.3598	97.0194	85.7282	86.0974	73.2063	74.8544	83.2559	92.1337	97.4635	96.3451	98.1271	99.1706	97.9077	95.2534	95.826	97.7043	97.6187
