# Supplementary material for: TAK1-mediated phosphorylation of PLCE1 represses PIP2 hydrolysis to impede esophageal squamous cancer metastasis
Source: eLife. 2025 Apr 23;13:RP97373. doi: 10.7554/eLife.97373 (PMC12017773; doi:10.7554/eLife.97373)
Supplement: Figure 4—figure supplement 2—source data 1. [file elife-97373-fig4-figsupp2-data1.xlsx]

## Sheet: Figure S2B
	EV			TAK1
TAK1/Actin	1.21243	0.944919	0.842652	13.1466	12.298	11.79
p-IKK/IKK	0.810186	1.17078	1.01903	2.43795	1.4491	1.98334
p-JNK/JNK	1.03429	1.14975	0.815963	1.54598	1.67946	1.44352
p-ERK/ERK	0.99647	1.12465	0.878879	1.80538	1.65977	1.46205
p-P38/P38	0.838586	1.13658	1.02483	1.43092	1.55634	1.62679

## Sheet: Figure S2D
	NC			Map3k7 siRNA
TAK1/Actin	0.808762	1.09927	1.09197	0.302094	0.516693	0.594914
p-IKK/IKK	0.995272	0.94338	1.06135	0.307572	0.189751	0.344727
p-JNK/JNK	0.905009	1.27713	0.81786	0.182624	0.373109	0.589076
p-ERK/ERK	0.775465	1.17914	1.04539	0.481755	0.571617	0.441121
p-P38/P38	0.942622	0.95315	1.10423	0.642535	0.542915	0.715267
