# Supplementary material for: TAK1-mediated phosphorylation of PLCE1 represses PIP2 hydrolysis to impede esophageal squamous cancer metastasis
Source: eLife. 2025 Apr 23;13:RP97373. doi: 10.7554/eLife.97373 (PMC12017773; doi:10.7554/eLife.97373)
Supplement: Figure 4—source data 1. [file elife-97373-fig4-data1.xlsx]

## Sheet: Figure 4A
PLCE1	PLCE1+TAK1
2.05783	1.27944
1.74292	1.04435
2.39566	0.686863

## Sheet: Figure 4B
PLCE1 S1060A	PLCE1 S1060A+TAK1
1.81782	1.95354
2.18853	1.63791
2.05613	2.26918

## Sheet: Figure 4C
IP3					DAG
EV	PLCE1	TAK1+PLCE1			EV	PLCE1	TAK1+PLCE1
861.915	932.31	721.861			17.0111	18.2696	16.1884
794.336	963.284	737.895			16.8013	23.7932	14.5162
845.02	1106.89	805.239			14.6339	23.5834	15.8699

## Sheet: Figure 4D
IP3					DAG
EV	PLCE1	TAK1+PLCE1			EV	PLCE1	TAK1+PLCE1
883.56	2875.96	1685.64			30.5732	125.419	69.867
906.536	1885.57	1745.24			30.8268	116.346	78.7466
929.513	3202.88	1506.83			37.1024	119.689	71.3469

## Sheet: Figure 4E
IP3					DAG
EV	PLCE1	TAK1+PLCE1			EV	PLCE1	TAK1+PLCE1
543.322	752.542	515.058			23.6282	28.6369	24.7797
278.829	692.262	491.019			23.2772	29.6548	26.7251
411.075	769.421	515.827			22.4751	28.5771	24.8849

## Sheet: Figure 4G
EV	PLCE1	PLCE1+TAK1
22.172	54.744	19.029
18.256	43.425	23.257
16.371	49.114	18.229

## Sheet: Figure 4H
ECA109				KYSE-150				TE-1
EV	PLCE1	PLCE1+TAK1		EV	PLCE1	PLCE1+TAK1		EV	PLCE1	PLCE1+TAK1
256	284	269		282	333	318		293	333	294
268	277	262		289	336	309		290	318	297
265	297	257		263	354	291		306	336	301

## Sheet: Figure 4I
EV	PLCE1	PLCE1+TAK1
10	19.4	10.7
10.7	21	9.78
9.6	19	10.9
