# Supplementary material for: TAK1-mediated phosphorylation of PLCE1 represses PIP2 hydrolysis to impede esophageal squamous cancer metastasis
Source: eLife. 2025 Apr 23;13:RP97373. doi: 10.7554/eLife.97373 (PMC12017773; doi:10.7554/eLife.97373)
Supplement: Figure 5—figure supplement 1—source data 1. [file elife-97373-fig5-figsupp1-data1.xlsx]

## Sheet: Figure S1B
EV	PLCE1	PLCE1+2-APB
7.233	29.209	8.84
6.882	28.861	14.614
6.016	19.394	11.505

## Sheet: Figure S1C
EV	PLCE1	PLCE1+2-APB
290	397	274
259	414	318
335	466	350

## Sheet: Figure S1E
EV	PLCE1	PLCE1+2-APB
8.496	15.461	12.498
6.674	22.724	9.075
10.084	14.728	8.84
