# Supplementary material for: TAK1-mediated phosphorylation of PLCE1 represses PIP2 hydrolysis to impede esophageal squamous cancer metastasis
Source: eLife. 2025 Apr 23;13:RP97373. doi: 10.7554/eLife.97373 (PMC12017773; doi:10.7554/eLife.97373)
Supplement: Figure 5—figure supplement 2—source data 1. [file elife-97373-fig5-figsupp2-data1.xlsx]

## Sheet: Figure S2B
Migration				Invasion
EV	PLCE1	PLCE1+2-APB		EV	PLCE1	PLCE1+2-APB
244	428	260		34	63	42
217	506	212		49	75	55
312	293	280		36	82	42
342	487	311		39	88	47
276	441	193		42	85	44

## Sheet: Figure S2D
	EV					PLCE1					PLCE1+2-APB
24h	31.4121	29.5004	25.9093	23.0902	19.5575	39.4028	43.192	44.3796	34.056	28.0558	21.8211	24.8171	27.332	32.1548	28.911
48h	82.0858	61.5268	56.7826	58.0421	61.506	82.8389	85.9306	84.9443	86.4935	70.9866	68.8224	65.4403	76.2785	70.6904	66.4678

## Sheet: Figure S2E
	EV			PLCE1			PLCE1+2-APB
CDH1	1	1.13	0.89	0.43	0.51	0.7	0.85	0.94	0.93
CTNNB1	1.27	0.87	0.9	1.59	1.28	1.13	0.9	1.5	1.35
TJP1	0.82	1.14	1.07	0.96	0.82	0.74	1.37	0.9	1.29
CLDN1	0.93	1.06	1.02	0.57	0.61	0.57	1.31	0.99	1.07
CDH2	0.97	0.94	1.09	2.11	2.71	2.31	1.39	1.73	1.27
VIM	1	0.96	1.04	1.34	1.14	0.94	1.01	1.14	1.01
SNAI1	1.34	0.96	0.87	1.93	2.01	2.17	1.37	1.71	1.12
ZEB1	0.93	0.91	1.18	2.38	3.95	3.09	2.19	1.63	1.97
