# Supplementary material for: TAK1-mediated phosphorylation of PLCE1 represses PIP2 hydrolysis to impede esophageal squamous cancer metastasis
Source: eLife. 2025 Apr 23;13:RP97373. doi: 10.7554/eLife.97373 (PMC12017773; doi:10.7554/eLife.97373)
Supplement: Figure 5—figure supplement 3—source data 1. [file elife-97373-fig5-figsupp3-data1.xlsx]

## Sheet: Figure S3B
Migration				Invasion
EV	PLCE1	PLCE1+2-APB		EV	PLCE1	PLCE1+2-APB
139	182	82		134	222	134
145	184	76		124	181	104
117	230	100		138	231	96
148	247	104		112	170	130
150	218	71		110	235	120

## Sheet: Figure S3D
EV	PLCE1	PLCE1+2-APB
58.8022	86.6523	45.5229
41.4704	81.4008	69.1765
36.5766	78.7727	54.5144
33.158	61.5196	61.8467
62.7117	74.5179	55.4828

## Sheet: Figure S3E
	EV			PLCE1			PLCE1+2-APB
CDH1	1.01866	1.06191	0.92445	0.9569	0.9569	0.7287	1.15669	1.13288	1.15669
TJP1	1.04729	0.905425	1.05458	0.779165	1.11729	1.03527	1.28343	1.23114	1.10957
CDH2	1.07026	0.712401	1.31156	1.98952	1.84076	1.91001	1.42077	1.30259	1.03125
VIM	0.903335	1.11987	0.988514	1.01866	0.97041	1.09936	0.983957	1.04006	1.09936
SNAl1	0.93975	1.03613	1.02701	1.65524	1.54564	1.64825	0.540604	0.500214	0.715912
