# Supplementary material for: TAK1-mediated phosphorylation of PLCE1 represses PIP2 hydrolysis to impede esophageal squamous cancer metastasis
Source: eLife. 2025 Apr 23;13:RP97373. doi: 10.7554/eLife.97373 (PMC12017773; doi:10.7554/eLife.97373)
Supplement: Figure 5—figure supplement 4—source data 1. [file elife-97373-fig5-figsupp4-data1.xlsx]

## Sheet: Figure S4B
Migration				Invasion
EV	PLCE1	PLCE1+2-APB		EV	PLCE1	PLCE1+2-APB
301	608	388		267	501	136
355	531	339		185	561	182
312	514	346		190	412	186
267	443	291		262	366	255
214	482	255		179	386	224

## Sheet: Figure S4D
EV	PLCE1	PLCE1+2-APB
76.3869	95.9977	48.0893
70.8076	99.5298	77.8143
83.7618	95.8686	53.9922
72.7111	97.1095	39.7356
59.3886	99.3557	72.2749

## Sheet: Figure S4E
	EV			PLCE1			PLCE1+2-APB
CDH1	0.780967	1.1434	1.11987	0.528509	0.547147	0.521233	1.03288	1.04006	0.97716
CTNNB1	0.874583	0.990801	1.15402	0.780967	0.300062	0.935191	0.913831	0.920187	0.795536
CLDN1	0.946058	1.02101	1.03527	1.08423	0.963709	1.0473	1.46748	1.37873	1.4077
SNAl1	0.97942	0.913831	1.11729	2.21402	2.4737	2.15348	1.2864	0.74398	0.814133
SNAl2	1.31322	0.71512	1.06484	2.40367	3.21863	3.3698	0.632715	0.797858	0.84663
ZEB1	0.905958	1.17611	0.938523	3.47697	2.54386	3.68555	0.722948	0.60709	0.41747
