# Supplementary material for: TAK1-mediated phosphorylation of PLCE1 represses PIP2 hydrolysis to impede esophageal squamous cancer metastasis
Source: eLife. 2025 Apr 23;13:RP97373. doi: 10.7554/eLife.97373 (PMC12017773; doi:10.7554/eLife.97373)
Supplement: Figure 5—figure supplement 5—source data 1. [file elife-97373-fig5-figsupp5-data1.xlsx]

## Sheet: Figure S5B
Migration				Invasion
EV	PLCE1	PLCE1+BAPTA-AM		EV	PLCE1	PLCE1+BAPTA-AM
247	296	175		108	110	73
260	275	115		70	119	106
246	320	140		78	128	102
265	278	200		98	112	97
231	322	184		58	113	76

## Sheet: Figure S5D
	EV					PLCE1					PLCE1+BAPTA-AM
24h	36.2425	40.7518	41.8119	44.9379	44.8864	46.8759	37.8705	38.9244	44.1012	44.8887	28.3877	42.4289	33.0656	45.398	39.6661
48h	63.5726	68.781	72.762	74.0497	66.5739	82.3033	90.4742	89.0489	72.9651	88.3687	71.9418	61.1763	75.7254	72.1546	69.0406
