# Supplementary material for: TAK1-mediated phosphorylation of PLCE1 represses PIP2 hydrolysis to impede esophageal squamous cancer metastasis
Source: eLife. 2025 Apr 23;13:RP97373. doi: 10.7554/eLife.97373 (PMC12017773; doi:10.7554/eLife.97373)
Supplement: Figure 5—figure supplement 6—source data 1. [file elife-97373-fig5-figsupp6-data1.xlsx]

## Sheet: Figure S6B
Migration				Invasion
EV	PLCE1	PLCE1+Midostaurin		EV	PLCE1	PLCE1+Midostaurin
144	355	101		252	428	108
149	462	105		184	433	95
232	407	132		160	316	155
178	371	200		254	437	132
180	373	149		191	384	110

## Sheet: Figure S6D
	EV					PLCE1					PLCE1+Midostaurin
24h	21.2151	18.1393	12.547	18.0935	16.1973	30.2084	30.4991	26.3907	23.2224	21.0002	22.9662	20.2012	16.094	11.8257	26.2359
48h	42.1606	46.2938	36.9395	32.7606	42.6995	54.2947	53.9016	55.5996	71.3893	66.4205	32.5767	22.3595	42.1066	41.4247	56.447
