# Supplementary material for: TAK1-mediated phosphorylation of PLCE1 represses PIP2 hydrolysis to impede esophageal squamous cancer metastasis
Source: eLife. 2025 Apr 23;13:RP97373. doi: 10.7554/eLife.97373 (PMC12017773; doi:10.7554/eLife.97373)
Supplement: Figure 5—figure supplement 7—source data 1. [file elife-97373-fig5-figsupp7-data1.xlsx]

## Sheet: Figure S7A
	EV			PLCE1			PLCE1+2-APB
p-PKC/PKC	1.08807	0.753274	1.15865	2.6748	1.69839	1.86774	1.13313	0.632765	1.23338
p-GSK-3β/GSK-3β	1.23466	1.17914	0.586195	2.04227	2.08414	2.09163	1.27892	1.20708	0.994724
p-β-catenin/Actin	0.98102	1.01475	1.00423	0.606086	0.664233	0.78176	1.19614	1.2325	1.18613
MMP2/Actin	0.835777	1.29401	0.870212	1.44653	2.05992	1.62556	0.583999	0.968557	0.615024

## Sheet: Figure S7B
	EV			PLCE1			PLCE1+BAPTA-AM
p-PKC/PKC	0.473575	1.22377	1.30265	2.0414	2.77544	2.16813	0.793975	1.42242	1.31686
p-GSK-3β/GSK-3β	0.937483	0.90806	1.15446	1.63972	1.70894	1.77795	0.764255	0.999777	0.492861
p-β-catenin/Actin	0.999605	1.03425	0.966144	0.729442	0.685483	0.650969	1.17929	1.19647	1.10003
MMP2/Actin	0.956874	0.935599	1.10753	1.71243	1.67899	1.31867	0.25726	0.254106	0.280103

## Sheet: Figure S7C
	EV			PLCE1			PLCE1+Midostaurin
p-PKC/PKC	1.4087	0.539007	1.05229	3.41377	2.50557	1.78501	0.793674	1.40562	1.24881
p-GSK-3β/GSK-3β	1.05316	1.04305	0.903797	1.95921	2.36968	1.81743	0.777767	1.08019	0.634867
p-β-catenin/Actin	1.07436	0.850209	1.07544	0.536198	0.617782	0.561684	1.00329	1.05413	1.00041
MMP2/Actin	1.46899	0.976475	0.55453	3.09745	3.38989	3.33387	0.984384	0.987345	0.96679

## Sheet: Figure S7D
	EV			PLCE1			PLCE1+TAK1
p-PKC/PKC	0.899596	1.04613	0.891436	1.16021	1.25962	1.28835	0.83713	0.607535	0.906421
p-GSK-3β/GSK-3β	1.06023	1.06771	0.87206	1.48311	1.45947	1.17197	0.982365	1.00409	0.58272
p-β-catenin/Actin	0.969507	1.02713	1.00336	0.763486	0.755969	0.769169	1.49975	1.34438	1.29133
MMP2/Actin	0.926513	0.896638	1.17685	2.03094	2.03613	2.06306	1.21262	1.19529	0.83571

## Sheet: Figure S7E
	EV			PLCE1			PLCE1+TAK1 K63W
p-PKC/PKC	0.971546	1.00669	1.02177	1.83112	2.21455	1.85542	2.11157	2.15988	2.11506
p-GSK-3β/GSK-3β	0.780467	1.44205	0.777486	2.85	3.21705	2.84466	3.35893	3.59594	3.34224
p-β-catenin/Actin	0.996846	1.00302	1.00013	0.352892	0.340157	0.355371	0.495749	0.481253	0.505533
MMP2/Actin	0.983379	0.971827	1.04479	1.77272	1.80145	1.74231	1.77999	1.83261	1.72101

## Sheet: Figure S7F
	EV			PLCE1 S1060A			PLCE1 S1060A+TAK1
p-PKC/PKC	0.941382	0.97824	1.08038	2.00946	1.94795	2.13287	2.64007	2.55888	2.62296
p-GSK-3β/GSK-3β	1.2244	0.889841	0.885762	1.85955	1.87156	1.86421	2.22455	2.11572	2.10349
p-β-catenin/Actin	1.01479	0.994958	0.990249	0.488772	0.518414	0.518758	0.681392	0.671334	0.671154
MMP2/Actin	1.01486	1.00375	0.98139	2.09382	2.03655	2.09362	2.50588	2.45583	2.48339
