# Supplementary material for: TAK1-mediated phosphorylation of PLCE1 represses PIP2 hydrolysis to impede esophageal squamous cancer metastasis
Source: eLife. 2025 Apr 23;13:RP97373. doi: 10.7554/eLife.97373 (PMC12017773; doi:10.7554/eLife.97373)
Supplement: Figure 6—figure supplement 1—source data 1. [file elife-97373-fig6-figsupp1-data1.xlsx]

## Sheet: Figure S1A
Vehicle	Takinib
17	20.603
22.5806	15.4589
13.6986	14.8837
19.0955	20.1005
24.3655	17.5532
15.534	20.2073

## Sheet: Figure S1B
LV-shPLCE1-NC	LV-shPLCE1
1.01924	0.449845
1.11535	0.367929
0.964264	0.355396
0.912249	0.440587

## Sheet: Figure S1C
LV-shPLCE1-NC	LV-shPLCE1
1.12269	0.238695
1.14227	0.30437
1.00146	0.29989
