# Supplementary material for: TAK1-mediated phosphorylation of PLCE1 represses PIP2 hydrolysis to impede esophageal squamous cancer metastasis
Source: eLife. 2025 Apr 23;13:RP97373. doi: 10.7554/eLife.97373 (PMC12017773; doi:10.7554/eLife.97373)
Supplement: Figure 6—source data 1. [file elife-97373-fig6-data1.xlsx]

## Sheet: Figure 6C
NC	Takinib
2	9
1	6
0	7
3	13
2	15
0	10

## Sheet: Figure 6E
	NC			Takinib
p-TAK1	0.738425	1.23989	1.09028	0.575793	0.476954	0.379868
p-PLCE1/Actin	0.955233	1.24217	0.802592	0.715561	0.541348	0.330121
p-PKC/PKC	0.879548	0.862119	1.25833	2.56902	2.81665	3.92163
p-GSK-3β/GSK-3β	0.73025	1.03544	1.23431	1.72698	1.57402	2.16879
p-β-catenin/Actin	1.09828	1.05369	0.770851	0.550024	0.69084	0.257597
MMP2	0.632178	1.24741	1.12041	2.13449	1.44108	1.74524
