# Supplementary material for: TAK1-mediated phosphorylation of PLCE1 represses PIP2 hydrolysis to impede esophageal squamous cancer metastasis
Source: eLife. 2025 Apr 23;13:RP97373. doi: 10.7554/eLife.97373 (PMC12017773; doi:10.7554/eLife.97373)
Supplement: Figure 7—source data 1. [file elife-97373-fig7-data1.xlsx]

## Sheet: Figure 7C
LV-shPLCE1 NC	LV-shPLCE1
4	1
5	4
5	3
9	0
4	0
4	3
3	1
10	0
9	5
13	2

## Sheet: Figure 7E
	LV-shPLCE1 NC			LV-shPLCE1
PLCE1	0.989162	1.05766	0.953181	0.534366	0.277755	0.0929028
p-PKC/PKC	0.993197	1.0947	0.930418	0.662502	0.384813	0.567978
p-GSK-3β/GSK-3β	0.997613	0.826775	1.0292	0.514511	0.553034	0.710272
p-β-catenin/Actin	0.845226	0.51546	1.63931	3.44533	2.62132	2.7117
MMP2	0.92779	0.824808	0.894111	0.443564	0.338059	0.215218
